# Supplementary material
Source: Elsevier journal article supplement (https://comptes-rendus.academie-sciences.fr/chimie/article/10.1016/j.crci.2010.04.020/file/attach/mmc2.pdf)

# checkCIF/PLATON report

No syntax errors found.    CIF dictionary    Interpreting this report

## Datablock: s01

---

Bond precision:    C-C = 0.0036 A                      Wavelength=0.71073

Cell:                      a=6.842(4)                      b=8.792(5)                      c=13.740(7)  
                            alpha=78.49(4)                      beta=85.24(2)                      gamma=84.24(2)

Temperature:            100 K

|                | Calculated              | Reported             |
|----------------|-------------------------|----------------------|
| Volume         | 804.1(8)                | 804.2(7)             |
| Space group    | P -1                    | P -1                 |
| Hall group     | -P 1                    | ?                    |
| Moiety formula | C11 H16 N2 P, C F3 O3 S | ?                    |
| Sum formula    | C12 H16 F3 N2 O3 P S    | C12 H16 F3 N2 O3 P S |
| Mr             | 356.31                  | 356.30               |
| Dx,g cm-3      | 1.472                   | 1.471                |
| Z              | 2                       | 2                    |
| Mu (mm-1)      | 0.344                   | 0.343                |
| F000           | 368.0                   | 368.0                |
| F000'          | 368.67                  |                      |
| h,k,lmax       | 8,10,16                 | 8,10,16              |
| Nref           | 3166                    | 3160                 |
| Tmin,Tmax      | 0.872,0.934             |                      |
| Tmin'          | 0.872                   |                      |

Correction method= Not given

Data completeness= 0.998                      Theta(max)= 26.000

R(reflections)= 0.0397( 2311)                      wR2(reflections)= 0.1086( 3160)

S = 0.961                                      Npar= 201

---

The following ALERTS were generated. Each ALERT has the format

**test-name\_ALERT\_alert-type\_alert-level.**

Click on the hyperlinks for more details of the test.

---

### Alert level C

|                                                                    |                                  |      |
|--------------------------------------------------------------------|----------------------------------|------|
| PLAT242_ALERT_2_C Check Low                                        | Ueq as Compared to Neighbors for | S1   |
| PLAT242_ALERT_2_C Check Low                                        | Ueq as Compared to Neighbors for | C12  |
| PLAT250_ALERT_2_C Large U3/U1 Ratio for Average U(i,j) Tensor .... |                                  | 2.15 |

---

0 ALERT level A = In general: serious problem

0 **ALERT level B** = Potentially serious problem  
3 **ALERT level C** = Check and explain  
0 **ALERT level G** = General alerts; check

0 ALERT type 1 CIF construction/syntax error, inconsistent or missing data  
3 ALERT type 2 Indicator that the structure model may be wrong or deficient  
0 ALERT type 3 Indicator that the structure quality may be low  
0 ALERT type 4 Improvement, methodology, query or suggestion  
0 ALERT type 5 Informative message, check

---

---

### **Publication of your CIF in IUCr journals**

**A basic structural check has been run on your CIF. These basic checks will be run on all CIFs submitted for publication in IUCr journals (*Acta Crystallographica*, *Journal of Applied Crystallography*, *Journal of Synchrotron Radiation*); however, if you intend to submit to *Acta Crystallographica Section C* or *E*, you should make sure that full publication checks are run on the final version of your CIF prior to submission.**

### **Publication of your CIF in other journals**

**Please refer to the *Notes for Authors* of the relevant journal for any special instructions relating to CIF submission.**

---

**PLATON version of 13/08/2009; check.def file version of 12/08/2009**

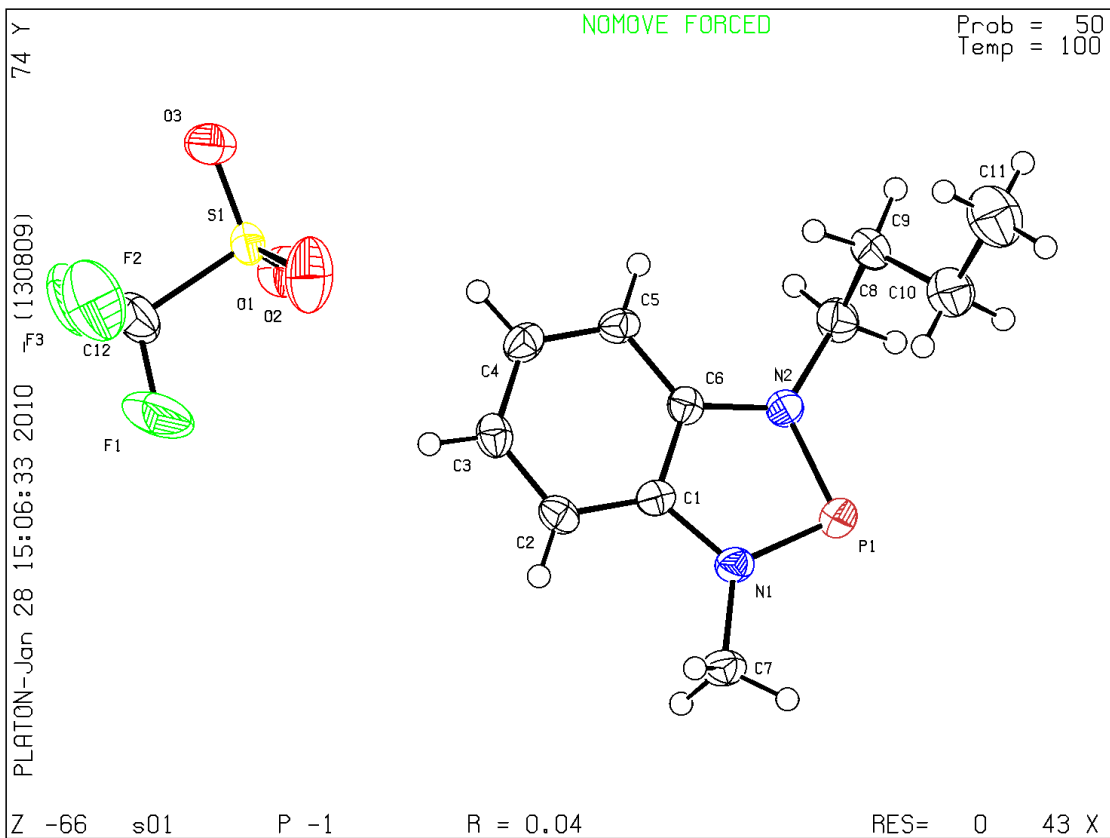

Supplement: mmc2 [file mmc2.pdf]
